# Supplementary material for: Comparative Study on Two Pretreatment Processes for Chemical Phase Analysis of Gold in Geological Samples by Atomic Absorption Spectrometry
Source: Hindawi journal article supplement (doi:10.1155/2019/1792792), 2019-07-10
Supplement: f1 [file 1792792.f1.pdf]

## Supplementary Materials

### **Comparative Study on Two Pretreatment Processes for Chemical Phase Analysis of Gold in Geological Samples by Atomic Absorption Spectrometry**

Xiaodan Tang<sup>1, 2</sup>, Hang Li<sup>2</sup>, Hongyan Liu<sup>1, 2</sup>, Bing Li<sup>2</sup>, Yuyan Zhao<sup>2</sup>, Jilong Lu<sup>2</sup>, Jian Zhou<sup>1, 3</sup>, Qingqing Liu<sup>1, 3\*</sup>

*<sup>1</sup>Key Laboratory of Geochemical Exploration, Ministry of Land and Resources, Institute of Geophysical and Geochemical Exploration, Chinese Academy of Geological Sciences, Langfang 065000, China*

*<sup>2</sup>College of Geo-exploration Science and Technology, Jilin University, Changchun 130026, China*

*<sup>3</sup>UNESCO International Centre on Global-Scale Geochemistry, Langfang 065000, China*

Correspondence should be addressed to Qingqing Liu. E-mail: liuqingqing@igge.cn

TABLE S1: The measured values of main constant and trace elements for CRMs GBW07105 and GBW07309 by XRF

| CRM      | Element                        | $C_1$    | $C_2$    | $C_3$    | $C_4$    | $C_5$    | $\bar{C}_i$ | $C_s$    | $\Delta\log C$<br>(GBW)/% | RSD<br>(GBW)/% |
|----------|--------------------------------|----------|----------|----------|----------|----------|-------------|----------|---------------------------|----------------|
| GBW07105 | Al <sub>2</sub> O <sub>3</sub> | 13.750   | 13.788   | 13.825   | 13.734   | 13.791   | 13.778      | 13.830   | 0.16                      | 0.50           |
|          | CaO                            | 9.072    | 9.068    | 9.070    | 9.074    | 9.069    | 9.071       | 8.810    | 1.27                      | 3.31           |
|          | Fe <sub>2</sub> O <sub>3</sub> | 14.022   | 13.996   | 13.973   | 13.982   | 13.970   | 13.989      | 13.400   | 1.87                      | 4.91           |
|          | K <sub>2</sub> O               | 2.402    | 2.395    | 2.395    | 2.396    | 2.393    | 2.396       | 2.320    | 1.40                      | 3.67           |
|          | MgO                            | 7.701    | 7.708    | 7.675    | 7.688    | 7.684    | 7.691       | 7.770    | 0.44                      | 1.15           |
|          | Na <sub>2</sub> O              | 3.272    | 3.246    | 3.258    | 3.205    | 3.262    | 3.248       | 3.380    | 1.72                      | 4.42           |
|          | SiO <sub>2</sub>               | 44.289   | 44.317   | 44.292   | 44.301   | 44.251   | 44.290      | 44.640   | 0.34                      | 0.88           |
|          | Co                             | 47.851   | 47.363   | 47.977   | 47.186   | 47.997   | 47.675      | 46.500   | 1.08                      | 2.94           |
|          | Cu                             | 50.429   | 50.819   | 50.227   | 50.191   | 50.699   | 50.473      | 49.000   | 1.29                      | 3.41           |
|          | Mn                             | 1264.066 | 1262.227 | 1246.589 | 1266.555 | 1248.527 | 1257.593    | 1310.000 | 1.77                      | 4.53           |
|          | Ni                             | 149.885  | 148.628  | 148.574  | 148.058  | 146.607  | 148.350     | 140.000  | 2.52                      | 6.72           |
|          | Pb                             | 7.229    | 7.073    | 7.356    | 7.834    | 7.039    | 7.306       | 7.000    | 1.86                      | 6.71           |
|          | Sn                             | 2.164    | 2.092    | 2.056    | 2.123    | 2.095    | 2.106       | 2.000    | 2.24                      | 6.26           |
|          | Zn                             | 157.781  | 159.366  | 157.984  | 156.587  | 159.171  | 158.178     | 150.000  | 2.31                      | 6.14           |
| GBW07309 | Al <sub>2</sub> O <sub>3</sub> | 10.117   | 10.836   | 10.727   | 10.897   | 10.673   | 10.650      | 10.580   | 0.29                      | 3.03           |
|          | CaO                            | 5.068    | 5.097    | 5.139    | 5.036    | 5.129    | 5.094       | 5.350    | 2.13                      | 5.42           |
|          | Fe <sub>2</sub> O <sub>3</sub> | 5.118    | 4.754    | 4.371    | 4.510    | 4.924    | 4.735       | 4.860    | 1.13                      | 6.85           |
|          | K <sub>2</sub> O               | 1.923    | 1.985    | 2.009    | 2.155    | 1.948    | 2.004       | 1.990    | 0.31                      | 4.62           |
|          | MgO                            | 2.336    | 2.133    | 2.434    | 2.400    | 2.213    | 2.303       | 2.390    | 1.61                      | 6.69           |
|          | Na <sub>2</sub> O              | 1.312    | 1.448    | 1.342    | 1.454    | 1.340    | 1.379       | 1.440    | 1.88                      | 6.62           |
|          | SiO <sub>2</sub>               | 63.363   | 64.318   | 63.363   | 60.024   | 61.932   | 62.600      | 64.890   | 1.56                      | 4.71           |
|          | Co                             | 13.182   | 13.446   | 13.895   | 14.278   | 13.710   | 13.702      | 14.400   | 2.16                      | 6.15           |
|          | Cu                             | 30.473   | 30.477   | 30.455   | 30.445   | 30.438   | 30.457      | 32.000   | 2.15                      | 5.39           |
|          | Mn                             | 624.537  | 625.506  | 626.018  | 622.740  | 623.317  | 624.424     | 620.000  | 0.31                      | 0.83           |
|          | Ni                             | 34.100   | 33.958   | 33.505   | 33.483   | 34.173   | 33.844      | 32.000   | 2.43                      | 6.52           |
|          | Pb                             | 23.737   | 24.124   | 24.186   | 23.909   | 23.773   | 23.946      | 23.000   | 1.75                      | 4.68           |
|          | Sn                             | 2.392    | 2.566    | 2.342    | 2.528    | 2.633    | 2.492       | 2.600    | 1.84                      | 6.58           |
|          | Zn                             | 72.830   | 76.583   | 73.221   | 78.899   | 71.376   | 74.582      | 78.000   | 1.95                      | 6.29           |

CRM: certified reference material;  $\Delta\log C$  (GBW): the logarithmic deviation of the CRM; RSD (GBW): the relative standard deviation of the CRM;  $C_s$ : the national standard value of the CRM;  $\bar{C}_i$ : the mean measured value of the CRM. The units of constant elements (Al<sub>2</sub>O<sub>3</sub>, CaO, Fe<sub>2</sub>O<sub>3</sub>, K<sub>2</sub>O, MgO, Na<sub>2</sub>O and SiO<sub>2</sub>) and trace elements (Co, Cu, Mn, Ni, Pb, Sn and Zn) are 10<sup>-2</sup> and 10<sup>-6</sup>, respectively.

TABLE S2: The measured values of total gold for CRMs GBW7247a and GBW07298a by AAS

| CRM                    | GBW07298a | GBW7247a |
|------------------------|-----------|----------|
| $C_1/10^{-6}$          | 30.165    | 0.050    |
| $C_2/10^{-6}$          | 29.470    | 0.046    |
| $C_3/10^{-6}$          | 32.205    | 0.049    |
| $C_4/10^{-6}$          | 31.430    | 0.050    |
| $C_5/10^{-6}$          | 30.905    | 0.047    |
| $\bar{C}_i/10^{-6}$    | 30.835    | 0.048    |
| $C_s/10^{-6}$          | 31.900    | 0.050    |
| $\Delta\log C$ (GBW)/% | 1.47      | 1.41     |
| RSD (GBW)/%            | 5.01      | 5.10     |

CRM: certified reference material;  $\Delta\log C$  (GBW): the logarithmic deviation of the CRM; RSD (GBW): the relative standard deviation of the CRM;  $C_s$ : the national standard value of the CRM;  $\bar{C}_i$ : the mean measured value of the CRM.

TABLE S3: The measured values of main constant and trace elements for six samples by XRF

| Sample | Element                        | Measured value 1 | Measured value 2 | Measured value 3 | Measured value 4 | Measured value 5 | Average value | SD      | RSD/% |
|--------|--------------------------------|------------------|------------------|------------------|------------------|------------------|---------------|---------|-------|
| LZY01  | Al <sub>2</sub> O <sub>3</sub> | 3.265            | 3.205            | 3.002            | 3.144            | 3.087            | 3.140         | 0.102   | 3.25  |
|        | CaO                            | 7.787            | 7.049            | 7.637            | 7.803            | 7.715            | 7.598         | 0.314   | 4.13  |
|        | Fe <sub>2</sub> O <sub>3</sub> | 34.812           | 34.083           | 34.610           | 33.317           | 35.016           | 34.367        | 0.682   | 1.98  |
|        | K <sub>2</sub> O               | 0.199            | 0.194            | 0.185            | 0.175            | 0.188            | 0.188         | 0.009   | 5.01  |
|        | MgO                            | 0.582            | 0.605            | 0.607            | 0.528            | 0.605            | 0.586         | 0.034   | 5.76  |
|        | Na <sub>2</sub> O              | 2.230            | 2.118            | 2.198            | 2.135            | 2.385            | 2.213         | 0.106   | 4.81  |
|        | SiO <sub>2</sub>               | 44.257           | 44.176           | 44.327           | 44.117           | 44.114           | 44.198        | 0.092   | 0.21  |
|        | Co                             | 257.154          | 258.306          | 255.469          | 253.664          | 250.851          | 255.089       | 2.947   | 1.16  |
|        | Cu                             | 944.381          | 860.877          | 897.531          | 890.029          | 911.360          | 900.836       | 30.542  | 3.39  |
|        | Mn                             | 1055.752         | 1055.908         | 1055.667         | 1056.040         | 1055.982         | 1055.870      | 0.156   | 0.01  |
|        | Ni                             | 47.272           | 50.741           | 50.819           | 43.832           | 49.381           | 48.409        | 2.934   | 6.06  |
|        | Pb                             | 36.964           | 36.522           | 42.080           | 41.053           | 40.799           | 39.484        | 2.552   | 6.46  |
|        | Sn                             | 0.604            | 0.608            | 0.609            | 0.610            | 0.604            | 0.607         | 0.003   | 0.45  |
| Zn     | 133.598                        | 133.021          | 133.274          | 133.529          | 133.121          | 133.309          | 0.251         | 0.19    |       |
| LZY02  | Al <sub>2</sub> O <sub>3</sub> | 8.096            | 8.857            | 9.037            | 9.132            | 9.457            | 8.916         | 0.507   | 5.69  |
|        | CaO                            | 14.122           | 13.971           | 13.922           | 14.695           | 13.858           | 14.113        | 0.339   | 2.40  |
|        | Fe <sub>2</sub> O <sub>3</sub> | 9.386            | 9.466            | 8.940            | 9.768            | 9.587            | 9.429         | 0.309   | 3.28  |
|        | K <sub>2</sub> O               | 1.687            | 1.785            | 1.648            | 1.720            | 1.626            | 1.693         | 0.063   | 3.71  |
|        | MgO                            | 2.576            | 2.587            | 2.381            | 2.254            | 2.564            | 2.472         | 0.149   | 6.01  |
|        | Na <sub>2</sub> O              | 0.202            | 0.188            | 0.199            | 0.206            | 0.212            | 0.201         | 0.009   | 4.43  |
|        | SiO <sub>2</sub>               | 55.474           | 57.737           | 60.724           | 56.634           | 62.154           | 58.545        | 2.807   | 4.79  |
|        | Co                             | 20.048           | 18.850           | 21.041           | 18.248           | 20.260           | 19.689        | 1.125   | 5.71  |
|        | Cu                             | 122.491          | 113.754          | 115.615          | 121.316          | 127.056          | 120.047       | 5.384   | 4.48  |
|        | Mn                             | 2129.355         | 1976.352         | 2152.936         | 1895.989         | 1861.202         | 2003.167      | 132.961 | 6.64  |
|        | Ni                             | 30.467           | 31.619           | 28.628           | 30.054           | 30.406           | 30.235        | 1.074   | 3.55  |
|        | Pb                             | 7.603            | 7.161            | 7.174            | 7.539            | 7.832            | 7.462         | 0.290   | 3.89  |
|        | Sn                             | 0.823            | 0.872            | 0.784            | 0.867            | 0.782            | 0.826         | 0.044   | 5.27  |
| Zn     | 154.075                        | 152.898          | 155.458          | 164.848          | 176.609          | 160.777          | 10.031        | 6.24    |       |
| LZY03  | Al <sub>2</sub> O <sub>3</sub> | 8.015            | 7.962            | 7.757            | 7.893            | 8.100            | 7.945         | 0.130   | 1.63  |
|        | CaO                            | 20.370           | 20.381           | 20.496           | 20.768           | 21.578           | 20.719        | 0.507   | 2.45  |
|        | Fe <sub>2</sub> O <sub>3</sub> | 8.447            | 8.674            | 8.503            | 8.718            | 9.043            | 8.677         | 0.234   | 2.69  |
|        | K <sub>2</sub> O               | 0.167            | 0.165            | 0.164            | 0.169            | 0.167            | 0.166         | 0.002   | 1.26  |
|        | MgO                            | 1.751            | 1.790            | 1.723            | 1.694            | 1.771            | 1.746         | 0.038   | 2.18  |
|        | Na <sub>2</sub> O              | 0.678            | 0.664            | 0.675            | 0.652            | 0.674            | 0.668         | 0.010   | 1.57  |
|        | SiO <sub>2</sub>               | 46.595           | 45.643           | 49.160           | 46.851           | 48.426           | 47.335        | 1.429   | 3.02  |
|        | Co                             | 17.832           | 18.078           | 19.581           | 18.000           | 18.467           | 18.392        | 0.705   | 3.83  |
|        | Cu                             | 1980.223         | 1860.646         | 1851.294         | 1792.080         | 1797.899         | 1856.429      | 75.723  | 4.08  |
|        | Mn                             | 1817.844         | 1847.943         | 1921.467         | 1790.239         | 1866.528         | 1848.804      | 49.958  | 2.70  |
|        | Ni                             | 12.300           | 10.484           | 10.717           | 12.127           | 11.565           | 11.438        | 0.816   | 7.13  |
|        | Pb                             | 14.498           | 14.563           | 13.633           | 15.508           | 13.848           | 14.410        | 0.734   | 5.10  |
|        | Sn                             | 0.759            | 0.700            | 0.785            | 0.733            | 0.730            | 0.742         | 0.032   | 4.34  |
| Zn     | 136.609                        | 125.458          | 138.306          | 133.043          | 139.564          | 134.596          | 5.666         | 4.21    |       |
| LZY04  | Al <sub>2</sub> O <sub>3</sub> | 7.927            | 8.135            | 8.149            | 8.092            | 8.009            | 8.062         | 0.093   | 1.16  |
|        | CaO                            | 15.407           | 15.249           | 15.299           | 15.537           | 15.351           | 15.368        | 0.111   | 0.72  |
|        | Fe <sub>2</sub> O <sub>3</sub> | 10.258           | 10.341           | 10.236           | 10.185           | 10.199           | 10.244        | 0.062   | 0.60  |
|        | K <sub>2</sub> O               | 2.023            | 2.020            | 2.072            | 2.098            | 2.094            | 2.061         | 0.038   | 1.84  |
|        | MgO                            | 2.104            | 2.259            | 2.264            | 2.177            | 2.106            | 2.182         | 0.078   | 3.58  |
|        | Na <sub>2</sub> O              | 0.296            | 0.283            | 0.279            | 0.295            | 0.307            | 0.292         | 0.011   | 3.85  |
|        | SiO <sub>2</sub>               | 56.380           | 56.195           | 56.342           | 56.397           | 56.325           | 56.328        | 0.080   | 0.14  |
|        | Co                             | 19.829           | 20.867           | 20.974           | 20.755           | 19.858           | 20.457        | 0.565   | 2.76  |
|        | Cu                             | 230.112          | 259.772          | 245.536          | 231.434          | 250.689          | 243.509       | 12.703  | 5.22  |
|        | Mn                             | 1969.375         | 1975.407         | 1943.403         | 1941.972         | 2039.126         | 1973.857      | 39.455  | 2.00  |
|        | Ni                             | 20.310           | 18.815           | 20.220           | 21.109           | 19.682           | 20.027        | 0.848   | 4.23  |
|        | Pb                             | 4.660            | 4.111            | 4.508            | 4.708            | 4.536            | 4.505         | 0.235   | 5.22  |

|       |                                |         |         |         |         |         |         |        |      |
|-------|--------------------------------|---------|---------|---------|---------|---------|---------|--------|------|
| LZY05 | Sn                             | 0.803   | 0.748   | 0.746   | 0.830   | 0.793   | 0.784   | 0.036  | 4.65 |
|       | Zn                             | 144.568 | 139.569 | 139.831 | 146.275 | 149.336 | 143.916 | 4.212  | 2.93 |
|       | Al <sub>2</sub> O <sub>3</sub> | 12.284  | 12.537  | 12.373  | 12.481  | 12.843  | 12.504  | 0.213  | 1.71 |
|       | CaO                            | 9.333   | 9.475   | 9.525   | 9.655   | 9.437   | 9.485   | 0.119  | 1.25 |
|       | Fe <sub>2</sub> O <sub>3</sub> | 3.636   | 3.520   | 3.555   | 3.482   | 3.372   | 3.513   | 0.097  | 2.77 |
|       | K <sub>2</sub> O               | 1.603   | 1.600   | 1.602   | 1.595   | 1.600   | 1.600   | 0.003  | 0.20 |
|       | MgO                            | 1.073   | 1.187   | 1.171   | 1.162   | 1.085   | 1.136   | 0.052  | 4.62 |
|       | Na <sub>2</sub> O              | 1.924   | 1.969   | 1.940   | 2.057   | 1.950   | 1.968   | 0.053  | 2.68 |
|       | SiO <sub>2</sub>               | 61.897  | 61.905  | 60.988  | 61.971  | 62.014  | 61.755  | 0.432  | 0.70 |
|       | Co                             | 5.968   | 6.464   | 6.303   | 6.042   | 6.032   | 6.162   | 0.212  | 3.44 |
|       | Cu                             | 160.476 | 150.965 | 156.675 | 157.624 | 160.410 | 157.230 | 3.884  | 2.47 |
|       | Mn                             | 540.555 | 545.632 | 569.388 | 589.756 | 528.636 | 554.794 | 24.527 | 4.42 |
|       | Ni                             | 4.540   | 4.707   | 4.708   | 4.774   | 5.076   | 4.761   | 0.196  | 4.12 |
|       | Pb                             | 13.510  | 12.984  | 13.375  | 13.664  | 12.984  | 13.303  | 0.309  | 2.32 |
| LZS01 | Sn                             | 1.675   | 1.864   | 1.819   | 1.739   | 1.688   | 1.757   | 0.082  | 4.68 |
|       | Zn                             | 24.902  | 26.200  | 24.172  | 23.820  | 25.432  | 24.905  | 0.958  | 3.85 |
|       | Al <sub>2</sub> O <sub>3</sub> | 11.065  | 11.432  | 11.076  | 11.455  | 11.563  | 11.318  | 0.231  | 2.04 |
|       | CaO                            | 1.536   | 1.518   | 1.525   | 1.529   | 1.511   | 1.524   | 0.010  | 0.64 |
|       | Fe <sub>2</sub> O <sub>3</sub> | 1.628   | 1.610   | 1.612   | 1.632   | 1.620   | 1.620   | 0.009  | 0.57 |
|       | K <sub>2</sub> O               | 3.483   | 3.429   | 3.396   | 3.470   | 3.438   | 3.443   | 0.034  | 1.00 |
|       | MgO                            | 0.431   | 0.433   | 0.435   | 0.429   | 0.427   | 0.431   | 0.003  | 0.78 |
|       | Na <sub>2</sub> O              | 2.424   | 2.450   | 2.485   | 2.474   | 2.453   | 2.457   | 0.024  | 0.96 |
|       | SiO <sub>2</sub>               | 63.201  | 63.191  | 62.903  | 62.920  | 63.092  | 63.061  | 0.144  | 0.23 |
|       | Co                             | 1.438   | 1.483   | 1.475   | 1.460   | 1.518   | 1.475   | 0.030  | 2.01 |
|       | Cu                             | 27.050  | 27.209  | 24.938  | 26.590  | 25.032  | 26.164  | 1.100  | 4.20 |
|       | Mn                             | 117.755 | 121.233 | 110.754 | 117.385 | 121.075 | 117.641 | 4.249  | 3.61 |
|       | Ni                             | 2.476   | 2.710   | 2.658   | 2.537   | 2.428   | 2.562   | 0.119  | 4.66 |
|       | Pb                             | 46.642  | 48.792  | 48.543  | 49.034  | 47.010  | 48.004  | 1.097  | 2.29 |
| Sn    | 0.050                          | 0.056   | 0.050   | 0.052   | 0.055   | 0.052   | 0.003   | 4.92   |      |
| Zn    | 313.682                        | 296.468 | 290.473 | 282.647 | 302.938 | 297.242 | 11.855  | 3.99   |      |

The units of measured, average and SD values for constant elements (Al<sub>2</sub>O<sub>3</sub>, CaO, Fe<sub>2</sub>O<sub>3</sub>, K<sub>2</sub>O, MgO, Na<sub>2</sub>O and SiO<sub>2</sub>) and trace elements (Co, Cu, Mn, Ni, Pb, Sn and Zn) are 10<sup>-2</sup> and 10<sup>-6</sup>, respectively.

TABLE S4: The measured values of total gold for six samples by AAS

| Sample                            | LZY01  | LZY02 | LZY03  | LZY04 | LZY05 | LZS01 |
|-----------------------------------|--------|-------|--------|-------|-------|-------|
| Measured value 1/10 <sup>-6</sup> | 47.385 | 4.066 | 25.690 | 1.945 | 1.398 | 0.169 |
| Measured value 2/10 <sup>-6</sup> | 46.531 | 3.894 | 26.050 | 1.732 | 1.562 | 0.191 |
| Measured value 3/10 <sup>-6</sup> | 45.923 | 3.988 | 25.779 | 1.921 | 1.493 | 0.178 |
| Measured value 4/10 <sup>-6</sup> | 47.028 | 3.775 | 25.755 | 1.870 | 1.562 | 0.169 |
| Measured value 5/10 <sup>-6</sup> | 48.060 | 4.179 | 27.027 | 1.732 | 1.434 | 0.173 |
| Average value/10 <sup>-6</sup>    | 46.985 | 3.980 | 26.060 | 1.840 | 1.490 | 0.176 |
| SD/10 <sup>-6</sup>               | 0.814  | 0.155 | 0.558  | 0.102 | 0.074 | 0.009 |
| RSD/%                             | 1.73   | 3.90  | 2.14   | 5.56  | 4.98  | 5.21  |

TABLE S5: The measured values of phase gold for six samples by ultrasonic centrifugation method

| Sample | Phase | Measured value 1/10 <sup>-6</sup> | Measured value 2/10 <sup>-6</sup> | Measured value 3/10 <sup>-6</sup> | Measured value 4/10 <sup>-6</sup> | Measured value 5/10 <sup>-6</sup> | Average value/10 <sup>-6</sup> | SD/10 <sup>-6</sup> | RSD/% |
|--------|-------|-----------------------------------|-----------------------------------|-----------------------------------|-----------------------------------|-----------------------------------|--------------------------------|---------------------|-------|
| LZY01  | WSS   | 0.210                             | 0.201                             | 0.233                             | 0.210                             | 0.201                             | 0.211                          | 0.013               | 6.21  |
|        | IECAS | 0.236                             | 0.220                             | 0.204                             | 0.215                             | 0.236                             | 0.222                          | 0.014               | 6.24  |
|        | OMBS  | 22.133                            | 21.548                            | 21.416                            | 21.689                            | 22.494                            | 21.856                         | 0.447               | 2.05  |
|        | IMOBs | 0.023                             | 0.026                             | 0.023                             | 0.026                             | 0.023                             | 0.024                          | 0.002               | 6.79  |
|        | NSNS  | 0.201                             | 0.233                             | 0.215                             | 0.201                             | 0.215                             | 0.213                          | 0.013               | 6.19  |
|        | CBS   | 0.210                             | 0.215                             | 0.210                             | 0.220                             | 0.220                             | 0.215                          | 0.005               | 2.33  |
|        | SBS   | 0.288                             | 0.271                             | 0.256                             | 0.256                             | 0.288                             | 0.272                          | 0.016               | 5.89  |
|        | ISS   | 19.984                            | 23.726                            | 22.243                            | 21.416                            | 20.558                            | 21.585                         | 1.472               | 6.82  |
| LZY02  | WSS   | 0.000                             | 0.000                             | 0.000                             | 0.000                             | 0.000                             | 0.000                          | 0.000               | 0.00  |
|        | IECAS | 0.019                             | 0.019                             | 0.019                             | 0.019                             | 0.017                             | 0.019                          | 0.001               | 4.81  |
|        | OMBS  | 4.523                             | 4.261                             | 4.335                             | 4.638                             | 4.523                             | 4.456                          | 0.154               | 3.45  |
|        | IMOBs | 0.002                             | 0.002                             | 0.002                             | 0.002                             | 0.002                             | 0.002                          | 0.000               | 0.00  |
|        | NSNS  | 0.011                             | 0.010                             | 0.011                             | 0.011                             | 0.010                             | 0.011                          | 0.001               | 5.17  |
|        | CBS   | 0.005                             | 0.005                             | 0.005                             | 0.005                             | 0.005                             | 0.005                          | 0.000               | 0.00  |
|        | SBS   | 0.034                             | 0.038                             | 0.038                             | 0.034                             | 0.034                             | 0.036                          | 0.002               | 6.15  |
|        | ISS   | 0.062                             | 0.066                             | 0.064                             | 0.063                             | 0.068                             | 0.065                          | 0.002               | 3.73  |
| LZY03  | WSS   | 0.114                             | 0.122                             | 0.129                             | 0.111                             | 0.114                             | 0.118                          | 0.007               | 6.26  |
|        | IECAS | 0.111                             | 0.108                             | 0.114                             | 0.111                             | 0.111                             | 0.112                          | 0.002               | 1.34  |
|        | OMBS  | 12.189                            | 13.306                            | 11.839                            | 14.027                            | 13.169                            | 12.906                         | 0.886               | 6.86  |
|        | IMOBs | 0.014                             | 0.016                             | 0.014                             | 0.016                             | 0.015                             | 0.015                          | 0.001               | 6.67  |
|        | NSNS  | 0.124                             | 0.141                             | 0.134                             | 0.124                             | 0.141                             | 0.133                          | 0.009               | 6.42  |
|        | CBS   | 0.029                             | 0.033                             | 0.032                             | 0.030                             | 0.032                             | 0.031                          | 0.002               | 5.27  |
|        | SBS   | 0.159                             | 0.167                             | 0.153                             | 0.153                             | 0.159                             | 0.158                          | 0.006               | 3.64  |
|        | ISS   | 11.266                            | 12.027                            | 11.481                            | 11.114                            | 11.308                            | 11.439                         | 0.354               | 3.09  |
| LZY04  | WSS   | 0.000                             | 0.000                             | 0.000                             | 0.000                             | 0.000                             | 0.000                          | 0.000               | 0.00  |
|        | IECAS | 0.011                             | 0.012                             | 0.012                             | 0.012                             | 0.011                             | 0.012                          | 0.001               | 4.72  |
|        | OMBS  | 2.176                             | 2.161                             | 1.950                             | 2.043                             | 2.193                             | 2.105                          | 0.105               | 4.97  |
|        | IMOBs | 0.001                             | 0.001                             | 0.001                             | 0.001                             | 0.001                             | 0.001                          | 0.000               | 0.00  |
|        | NSNS  | 0.000                             | 0.000                             | 0.000                             | 0.000                             | 0.000                             | 0.000                          | 0.000               | 0.00  |
|        | CBS   | 0.003                             | 0.003                             | 0.003                             | 0.003                             | 0.003                             | 0.003                          | 0.000               | 0.00  |
|        | SBS   | 0.108                             | 0.111                             | 0.111                             | 0.108                             | 0.112                             | 0.110                          | 0.002               | 1.70  |
|        | ISS   | 0.114                             | 0.108                             | 0.106                             | 0.108                             | 0.111                             | 0.109                          | 0.003               | 2.86  |
| LZY05  | WSS   | 0.000                             | 0.000                             | 0.000                             | 0.000                             | 0.000                             | 0.000                          | 0.000               | 0.00  |
|        | IECAS | 0.019                             | 0.017                             | 0.019                             | 0.020                             | 0.019                             | 0.019                          | 0.001               | 5.83  |
|        | OMBS  | 1.723                             | 1.562                             | 1.616                             | 1.493                             | 1.434                             | 1.566                          | 0.112               | 7.14  |
|        | IMOBs | 0.002                             | 0.002                             | 0.002                             | 0.002                             | 0.002                             | 0.002                          | 0.000               | 0.00  |
|        | NSNS  | 0.000                             | 0.000                             | 0.000                             | 0.000                             | 0.000                             | 0.000                          | 0.000               | 0.00  |
|        | CBS   | 0.003                             | 0.003                             | 0.003                             | 0.003                             | 0.003                             | 0.003                          | 0.000               | 0.00  |
|        | SBS   | 0.017                             | 0.015                             | 0.017                             | 0.017                             | 0.015                             | 0.016                          | 0.001               | 6.76  |
|        | ISS   | 0.004                             | 0.004                             | 0.004                             | 0.004                             | 0.004                             | 0.004                          | 0.000               | 0.00  |
| LZS01  | WSS   | 0.000                             | 0.000                             | 0.000                             | 0.000                             | 0.000                             | 0.000                          | 0.000               | 0.00  |
|        | IECAS | 0.000                             | 0.000                             | 0.000                             | 0.000                             | 0.000                             | 0.000                          | 0.000               | 0.00  |
|        | OMBS  | 0.028                             | 0.031                             | 0.030                             | 0.029                             | 0.031                             | 0.030                          | 0.001               | 4.38  |
|        | IMOBs | 0.010                             | 0.011                             | 0.010                             | 0.011                             | 0.010                             | 0.010                          | 0.001               | 5.27  |
|        | NSNS  | 0.033                             | 0.037                             | 0.034                             | 0.036                             | 0.036                             | 0.035                          | 0.002               | 4.67  |
|        | CBS   | 0.006                             | 0.006                             | 0.006                             | 0.006                             | 0.006                             | 0.006                          | 0.000               | 0.00  |
|        | SBS   | 0.065                             | 0.077                             | 0.074                             | 0.075                             | 0.071                             | 0.072                          | 0.005               | 6.45  |
|        | ISS   | 0.009                             | 0.010                             | 0.009                             | 0.010                             | 0.010                             | 0.010                          | 0.001               | 5.71  |

WSS: water soluble state; IECAS: ion exchange and clay adsorption state; OMBS: organic matter bound state; IMOBs: iron-manganese oxide bound state; NSNS: naked or semi-naked state; CBS: carbonate bound state; SBS: sulfide bound state; ISS: insoluble silicate state.

TABLE S6: The measured values of phase gold for six samples by cyclotron oscillation method

| Sample | Phase | Measured value 1/10 <sup>-6</sup> | Measured value 2/10 <sup>-6</sup> | Measured value 3/10 <sup>-6</sup> | Measured value 4/10 <sup>-6</sup> | Measured value 5/10 <sup>-6</sup> | Average value/10 <sup>-6</sup> | SD/10 <sup>-6</sup> | RSD/% |
|--------|-------|-----------------------------------|-----------------------------------|-----------------------------------|-----------------------------------|-----------------------------------|--------------------------------|---------------------|-------|
| LZY01  | WSS   | 0.233                             | 0.210                             | 0.210                             | 0.233                             | 0.236                             | 0.224                          | 0.013               | 5.88  |
|        | IECAS | 0.243                             | 0.220                             | 0.243                             | 0.243                             | 0.243                             | 0.238                          | 0.010               | 4.31  |
|        | OMBS  | 0.243                             | 0.236                             | 0.236                             | 0.243                             | 0.243                             | 0.240                          | 0.004               | 1.69  |
|        | IMOBs | 0.025                             | 0.028                             | 0.026                             | 0.025                             | 0.028                             | 0.026                          | 0.002               | 5.74  |
|        | NSNS  | 0.220                             | 0.201                             | 0.233                             | 0.204                             | 0.220                             | 0.216                          | 0.013               | 6.09  |
|        | CBS   | 0.401                             | 0.386                             | 0.366                             | 0.401                             | 0.366                             | 0.384                          | 0.018               | 4.57  |
|        | SBS   | 20.558                            | 22.494                            | 22.133                            | 21.584                            | 24.537                            | 22.261                         | 1.467               | 6.59  |
|        | ISS   | 22.494                            | 22.243                            | 21.416                            | 20.017                            | 21.689                            | 21.572                         | 0.969               | 4.49  |
| LZY02  | WSS   | 0.006                             | 0.006                             | 0.006                             | 0.006                             | 0.006                             | 0.006                          | 0.000               | 0.00  |
|        | IECAS | 0.006                             | 0.006                             | 0.006                             | 0.006                             | 0.006                             | 0.006                          | 0.000               | 0.00  |
|        | OMBS  | 0.054                             | 0.049                             | 0.049                             | 0.054                             | 0.049                             | 0.051                          | 0.003               | 5.37  |
|        | IMOBs | 0.007                             | 0.006                             | 0.007                             | 0.007                             | 0.007                             | 0.007                          | 0.000               | 6.58  |
|        | NSNS  | 0.003                             | 0.003                             | 0.003                             | 0.003                             | 0.003                             | 0.003                          | 0.000               | 0.00  |
|        | CBS   | 0.030                             | 0.035                             | 0.030                             | 0.033                             | 0.033                             | 0.032                          | 0.002               | 6.73  |
|        | SBS   | 3.103                             | 3.217                             | 3.038                             | 2.879                             | 3.159                             | 3.079                          | 0.130               | 4.23  |
|        | ISS   | 0.603                             | 0.585                             | 0.591                             | 0.659                             | 0.585                             | 0.605                          | 0.031               | 5.17  |
| LZY03  | WSS   | 0.122                             | 0.129                             | 0.129                             | 0.122                             | 0.122                             | 0.125                          | 0.004               | 3.07  |
|        | IECAS | 0.201                             | 0.190                             | 0.201                             | 0.204                             | 0.175                             | 0.194                          | 0.012               | 6.17  |
|        | OMBS  | 1.229                             | 1.133                             | 1.195                             | 1.124                             | 1.133                             | 1.163                          | 0.047               | 4.01  |
|        | IMOBs | 0.016                             | 0.014                             | 0.014                             | 0.014                             | 0.014                             | 0.014                          | 0.001               | 6.21  |
|        | NSNS  | 0.111                             | 0.122                             | 0.122                             | 0.111                             | 0.111                             | 0.115                          | 0.006               | 5.22  |
|        | CBS   | 0.817                             | 0.726                             | 0.770                             | 0.826                             | 0.820                             | 0.792                          | 0.043               | 5.43  |
|        | SBS   | 11.114                            | 10.557                            | 11.308                            | 11.266                            | 11.481                            | 11.153                         | 0.408               | 3.66  |
|        | ISS   | 12.027                            | 11.481                            | 12.431                            | 11.308                            | 11.839                            | 11.817                         | 0.445               | 3.77  |
| LZY04  | WSS   | 0.000                             | 0.000                             | 0.000                             | 0.000                             | 0.000                             | 0.000                          | 0.000               | 0.00  |
|        | IECAS | 0.020                             | 0.019                             | 0.017                             | 0.020                             | 0.019                             | 0.019                          | 0.001               | 6.45  |
|        | OMBS  | 0.201                             | 0.210                             | 0.204                             | 0.201                             | 0.201                             | 0.203                          | 0.004               | 1.92  |
|        | IMOBs | 0.003                             | 0.003                             | 0.003                             | 0.003                             | 0.003                             | 0.003                          | 0.000               | 0.00  |
|        | NSNS  | 0.000                             | 0.000                             | 0.000                             | 0.000                             | 0.000                             | 0.000                          | 0.000               | 0.00  |
|        | CBS   | 0.039                             | 0.043                             | 0.040                             | 0.039                             | 0.043                             | 0.041                          | 0.002               | 5.02  |
|        | SBS   | 1.133                             | 1.043                             | 1.220                             | 1.043                             | 1.124                             | 1.113                          | 0.074               | 6.63  |
|        | ISS   | 0.191                             | 0.191                             | 0.178                             | 0.170                             | 0.170                             | 0.180                          | 0.011               | 5.87  |
| LZY05  | WSS   | 0.000                             | 0.000                             | 0.000                             | 0.000                             | 0.000                             | 0.000                          | 0.000               | 0.00  |
|        | IECAS | 0.006                             | 0.006                             | 0.006                             | 0.006                             | 0.006                             | 0.006                          | 0.000               | 0.00  |
|        | OMBS  | 0.204                             | 0.233                             | 0.210                             | 0.201                             | 0.215                             | 0.213                          | 0.013               | 5.94  |
|        | IMOBs | 0.001                             | 0.001                             | 0.001                             | 0.001                             | 0.001                             | 0.001                          | 0.000               | 0.00  |
|        | NSNS  | 0.000                             | 0.000                             | 0.000                             | 0.000                             | 0.000                             | 0.000                          | 0.000               | 0.00  |
|        | CBS   | 0.039                             | 0.044                             | 0.043                             | 0.040                             | 0.043                             | 0.042                          | 0.002               | 5.19  |
|        | SBS   | 1.043                             | 1.124                             | 1.223                             | 1.034                             | 1.220                             | 1.129                          | 0.092               | 8.11  |
|        | ISS   | 0.044                             | 0.050                             | 0.046                             | 0.048                             | 0.044                             | 0.046                          | 0.003               | 5.62  |
| LZS01  | WSS   | 0.000                             | 0.000                             | 0.000                             | 0.000                             | 0.000                             | 0.000                          | 0.000               | 0.00  |
|        | IECAS | 0.006                             | 0.006                             | 0.006                             | 0.006                             | 0.006                             | 0.006                          | 0.000               | 0.00  |
|        | OMBS  | 0.023                             | 0.022                             | 0.024                             | 0.021                             | 0.022                             | 0.022                          | 0.001               | 5.09  |
|        | IMOBs | 0.002                             | 0.002                             | 0.002                             | 0.002                             | 0.002                             | 0.002                          | 0.000               | 0.00  |
|        | NSNS  | 0.000                             | 0.000                             | 0.000                             | 0.000                             | 0.000                             | 0.000                          | 0.000               | 0.00  |
|        | CBS   | 0.024                             | 0.021                             | 0.023                             | 0.022                             | 0.024                             | 0.023                          | 0.001               | 5.72  |
|        | SBS   | 0.090                             | 0.102                             | 0.097                             | 0.092                             | 0.097                             | 0.096                          | 0.005               | 4.94  |
|        | ISS   | 0.040                             | 0.047                             | 0.045                             | 0.045                             | 0.043                             | 0.044                          | 0.003               | 6.01  |

WSS: water soluble state; IECAS: ion exchange and clay adsorption state; OMBS: organic matter bound state; IMOBs: iron-manganese oxide bound state; NSNS: naked or semi-naked state; CBS: carbonate bound state; SBS: sulfide bound state; ISS: insoluble silicate state.
